# Supplementary material for: Total organic halogen (TOX) species formation at different locations in drinking water distribution systems
Source: Royal Society of Chemistry journal article supplement (doi:10.1039/d0ew00421a), 2020-01-01
Supplement: d0ew00421a1.pdf [file d0ew00421a1.pdf]

1 Supplementary Information

2

3 **Total organic halogen (TOX) species formation at different locations in drinking water**

4 **distribution systems**

5

6 Daekyun Kim,<sup>a</sup> Amer Kanan,<sup>b</sup> Naushita Sharma,<sup>c</sup> Paul Westerhoff,<sup>c</sup> and Tanju Karanfil<sup>\*a</sup>

7

8

9 a. Department of Environmental Engineering and Earth Sciences

10 Clemson University, Anderson, South Carolina 29625, USA

11 b. Department of Environment and Earth Sciences

12 Al-Quds University, Jerusalem, Palestine

13 c. School of Sustainable Engineering and the Built Environment

14 Arizona State University, Tempe, Arizona 85287, USA

15

16 \*Corresponding author phone: (864) 656-7701; e-mail: tkaranf@clemson.edu

17 **Table S1.** Selected water quality parameters of intake waters

|         | DOC, mg L <sup>-1</sup> |        |      |        | SUVA <sub>254</sub> , L mg <sup>-1</sup> m <sup>-1</sup> |        |      |        | Bromide, µg L <sup>-1</sup> |        |      |        | Iodide, µg L <sup>-1</sup> |        |      |        | Iodate, µg L <sup>-1</sup> |        |      |        |  |
|---------|-------------------------|--------|------|--------|----------------------------------------------------------|--------|------|--------|-----------------------------|--------|------|--------|----------------------------|--------|------|--------|----------------------------|--------|------|--------|--|
|         | Spring                  | Summer | Fall | Winter | Spring                                                   | Summer | Fall | Winter | Spring                      | Summer | Fall | Winter | Spring                     | Summer | Fall | Winter | Spring                     | Summer | Fall | Winter |  |
| Plant1  | 4.4                     | 3.3    | 3.5  | 3.6    | 1.9                                                      | 2.3    | 2.2  | 2.6    | 128                         | 130    | 140  | 97     |                            | 1.2    |      |        |                            | 1.0    |      |        |  |
| Plant2  | 4.7                     | 3.4    | 3.6  | 3.7    | 1.8                                                      | 2.2    | 2.3  | 2.6    | 126                         | 130    | 140  | 92     |                            | 1.5    |      |        |                            | ND     |      |        |  |
| Plant3  | 4.8                     | 3.3    | 3.5  | 3.9    | 1.7                                                      | 2.0    | 1.9  | 2.6    | 131                         | 130    | 153  | 90     |                            | 2.6    |      |        |                            | ND     |      |        |  |
| Plant4  | 1.4                     | 0.3    | NM   | 1.0    | 0.1                                                      | 1.1    | NM   | 0.6    | 117                         | 100    | NM   | 89     | ND                         | ND     |      |        | 29.6                       | 28     |      |        |  |
| Plant5  | 2.6                     | 1.3    | 1.6  | 1.8    | 1.2                                                      | 1.0    | 1.1  | 1.1    | 171                         | 150    | 155  | 156    | 5.4                        | 7.1    |      |        | 78.7                       | 37     |      |        |  |
| Plant6  | NM                      | 3.2    | 4.8  | 4.1    | NM                                                       | 1.4    | 0.9  | 1.1    | NM                          | 480    | 513  | 444    |                            | 3.6    |      |        |                            | 9.4    |      |        |  |
| Plant7  | 3.8                     | 3.5    | 5.3  | 2.2    | 2.0                                                      | 4.2    | 3.9  | 3.4    | 13                          | 23     | 30   | 18     | ND                         |        |      |        |                            | ND     |      |        |  |
| Plant8  | 3.7                     | 2.1    | 2.6  | 1.7    | 1.8                                                      | 3.3    | 2.8  | 2.2    | 45                          | 70     | 45   | 59     | ND                         |        |      |        |                            | 1.1    |      |        |  |
| Plant9  | 3.4                     | 2.1    | 2.6  | 1.6    | 1.9                                                      | 3.6    | 2.8  | 2.4    | 33                          | 61     | 39   | 57     | ND                         |        |      |        |                            | ND     |      |        |  |
| Plant10 | 3.4                     | 3.9    | 2.9  | 2.7    | 1.6                                                      | 1.6    | 2.0  | 1.9    | 69                          | 58     | 69   | 62     | ND                         |        |      |        |                            | 1.7    |      |        |  |
| Plant11 | 3.4                     | 3.9    | 2.9  | 2.7    | 1.6                                                      | 1.6    | 2.0  | 1.9    | 69                          | 58     | 69   | 62     | ND                         |        |      |        |                            | 1.7    |      |        |  |

18 NM: not measure, ND: not detected.

19

20 **Table S2.** THMs ( $\mu\text{g L}^{-1}$ ) in the samples collected at effluent and in distribution system with average and maximum retention times.

|             | Spring   |        |        | Summer   |        |        | Fall     |        |        | Winter   |        |        |
|-------------|----------|--------|--------|----------|--------|--------|----------|--------|--------|----------|--------|--------|
|             | Effluent | Ave RT | Max RT |
| Plant1      | 53.3     | 46.6   | 48.0   | 81.6     | 71.6   | 77.9   | 75.9     | 78.3   | 83.9   | 29.5     | 25.5   | 28.0   |
| Plant2      | 46.2     | 41.3   | 42.5   | 65.9     | 57.8   | 49.6   | 68.2     | 78.9   | 66.2   | 26.5     | 22.2   | 22.2   |
| Plant3      | 53.0     | 46.2   | 47.8   | 59.3     | 63.6   | 62.4   | 63.8     | 69.9   | 62.1   | 29.8     | 22.7   | 25.4   |
| Plant4      | 0.2      | 15.0   | 8.0    | 0.6      | 18.4   | 15.9   | 0.7      | 14.6   | 14.1   | 0.2      | 6.5    | 8.4    |
| Plant5      | 15.4     | 9.7    | 4.6    | 21.0     | 23.4   | 17.8   | 12.9     | 20.4   | 17.5   | 5.2      | 11.3   | 4.0    |
| Plant6      |          |        |        | 32.4     | 41.4   | 51.3   | 28.7     | 11.4   | 42.3   | 16.1     | 6.7    | 25.5   |
| Plant7      | 74.8     | 75.4   | 76.1   | 109      | 95.3   | 101.5  | 54.3     | 41.2   | 44.1   | 11.4     | 10.8   | 13.5   |
| Plant8      | 77.3     | 75.8   | 64.7   | 109.6    | 94.5   | 101    | 46.9     | 46.2   | 45.3   | 10.9     | 11.5   | 12.3   |
| Plant9      | 90.1     | 74.6   | 86     | 77.4     | 85.2   | 81.5   | 34.3     | 34.3   | 41.8   | 8.6      | 7.8    | 8.3    |
| Plant1<br>0 | 9.2      | 35.9   | 33.3   | 20.2     | 65.9   | 97.9   | 17.2     | 66.6   | 87.4   | 14.1     | 49.4   | 55.3   |
| Palnt1<br>1 | 15.6     | 29.7   | 41.8   | 27.6     | 69.7   | 87.6   | 24.7     | 63.5   | 82.9   | 16.5     | 51.4   | 53.1   |

21

22 **Table S3.** HAAs ( $\mu\text{g L}^{-1}$ ) in the samples collected at effluent and in distribution system with average and maximum retention times.

|         | Spring   |        |        | Summer   |        |        | Fall     |        |        | Winter   |        |        |
|---------|----------|--------|--------|----------|--------|--------|----------|--------|--------|----------|--------|--------|
|         | Effluent | Ave RT | Max RT |
| Plant1  | 33.7     | 34.6   | 39.2   | 31.1     | 24.6   | 29.7   | 17.5     | 13.7   | 16.5   | 25.8     | 21.9   | 24.5   |
| Plant2  | 36.5     | 33.3   | 33.6   | 31.1     | 30.9   | 21.9   | 15.7     | 16.9   | 15.7   | 23.2     | 21.0   | 21.8   |
| Plant3  | 35.5     | 35.5   | 25.8   | 31.6     | 32.1   | 32.8   | 14.8     | 12.8   | 17.4   | 23.4     | 21.7   | 21.3   |
| Plant4  | 0.3      | 21.2   | 8.2    | 0.1      | 17.0   | 11.6   | 0.8      | 8.4    | 5.2    | 0.4      | 3.7    | 1.8    |
| Plant5  | 26.1     | 6.8    | 2.8    | 16.6     | 17.1   | 15.8   | 9.4      | 8.6    | 7.6    | 5.2      | 1.5    | 2.0    |
| Plant6  |          |        |        | 17.5     | 18.1   | 19.5   | 5.9      | 9.5    | 8.8    | 2.8      | 3.4    | 5.8    |
| Plant7  | 55.4     | 43.2   | 63.0   | 66.9     | 46.2   | 54.8   | 43.4     | 40.1   | 26.0   | 28.5     | 26.8   | 29.8   |
| Plant8  | 67.4     | 39.8   | 53.5   | 64.0     | 47.3   | 57.5   | 14.9     | 10.3   | 8.7    | 13.5     | 8.8    | 21.0   |
| Plant9  | 56.0     | 51.5   | 67.6   | 44.4     | 42.8   | 27.2   | 17.2     | 20.4   | 20.5   | 14.2     | 12.8   | 13.5   |
| Plant10 | 10.6     | 25.6   | 29.4   | 9.5      | 21.0   | 43.2   | 5.8      | 20.6   | 21.9   | 12.5     | 31.9   | 42.0   |
| Plant11 | 22.2     | 37.7   | 51.7   | 13.9     | 32.6   | 43.0   | 12.9     | 17.9   | 15.5   | 15.4     | 37.9   | 54.6   |

24 Table S4. Average temperature of the months when sampling events occurred in the areas where the  
 25 plants are located.

|              |                          | Spring   | Summer   | Fall     | Winter   |
|--------------|--------------------------|----------|----------|----------|----------|
| Plants 1-3   |                          | Apr 2019 | Jul 2019 | Oct 2019 | Jan 2019 |
|              | Ave. High (°C)           | 27.0     | 36.3     | 28.7     | 16.4     |
|              | Ave. Low (°C)            | 14.6     | 24.2     | 15.4     | 5.4      |
|              | Ave (°C)                 | 20.8     | 30.25    | 22.05    | 10.9     |
|              | Total Precipitation (mm) | 185.0    | 10       | 106.5    | 86.1     |
|              |                          |          |          |          |          |
| Plants 4-6   |                          | Mar 2019 | Jul 2019 | Oct 2019 | Dec 2018 |
|              | Ave. High (°C)           | 16.6     | 34.9     | 21.7     | 10.9     |
|              | Ave. Low (°C)            | 2.4      | 20.6     | 6.3      | -1.7     |
|              | Ave (°C)                 | 9.5      | 27.8     | 14.0     | 4.6      |
|              | Total Precipitation (mm) | 28.8     | 114.6    | 28.2     | 36.6     |
|              |                          |          |          |          |          |
| Plants 7-9   |                          | Apr 2019 | Aug 2019 | Oct 2018 | Jan 2019 |
|              | Ave. High (°C)           | 20.4     | 30.1     | 18.9     | 4.7      |
|              | Ave. Low (°C)            | 9.6      | 20.8     | 11.0     | -3.2     |
|              | Ave (°C)                 | 15.0     | 25.5     | 15.0     | 0.8      |
|              | Total Precipitation (mm) | 76.8     | 70.8     | 78.3     | 100.0    |
|              |                          |          |          |          |          |
| Plants 10,11 |                          | Mar 2019 | Jun 2019 | Oct 2019 | Jan 2020 |
|              | Ave. High (°C)           | 19.6     | 36.6     | 25.2     | 12.6     |
|              | Ave. Low (°C)            | 3.9      | 16.5     | 9.3      | -0.3     |
|              | Ave (°C)                 | 11.8     | 26.6     | 17.3     | 6.2      |
|              | Total Precipitation (mm) | 20.0     | 3.0      | 11.0     | 24.0     |

26

27

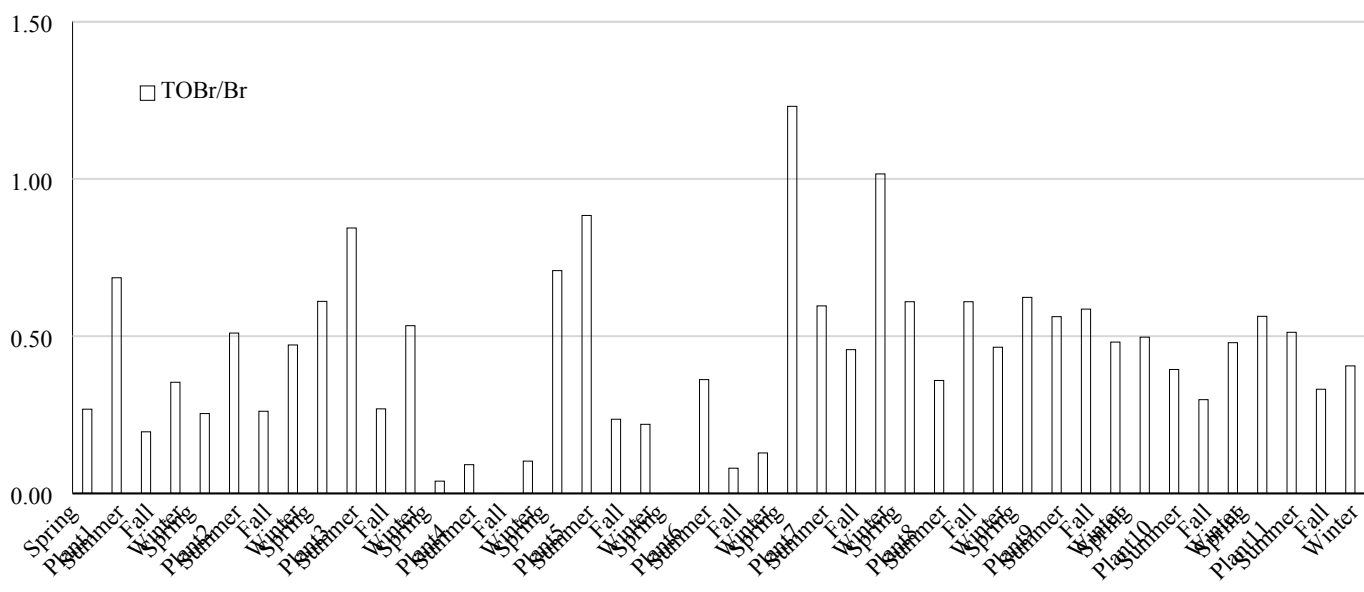

28  
 29 **Fig.S1** Seasonal changes of TOBr/Br<sup>-</sup> of eleven plants. TOBr as Cl<sup>-</sup> of plant effluent was divided by  
 30 influent Br<sup>-</sup>.  
 31

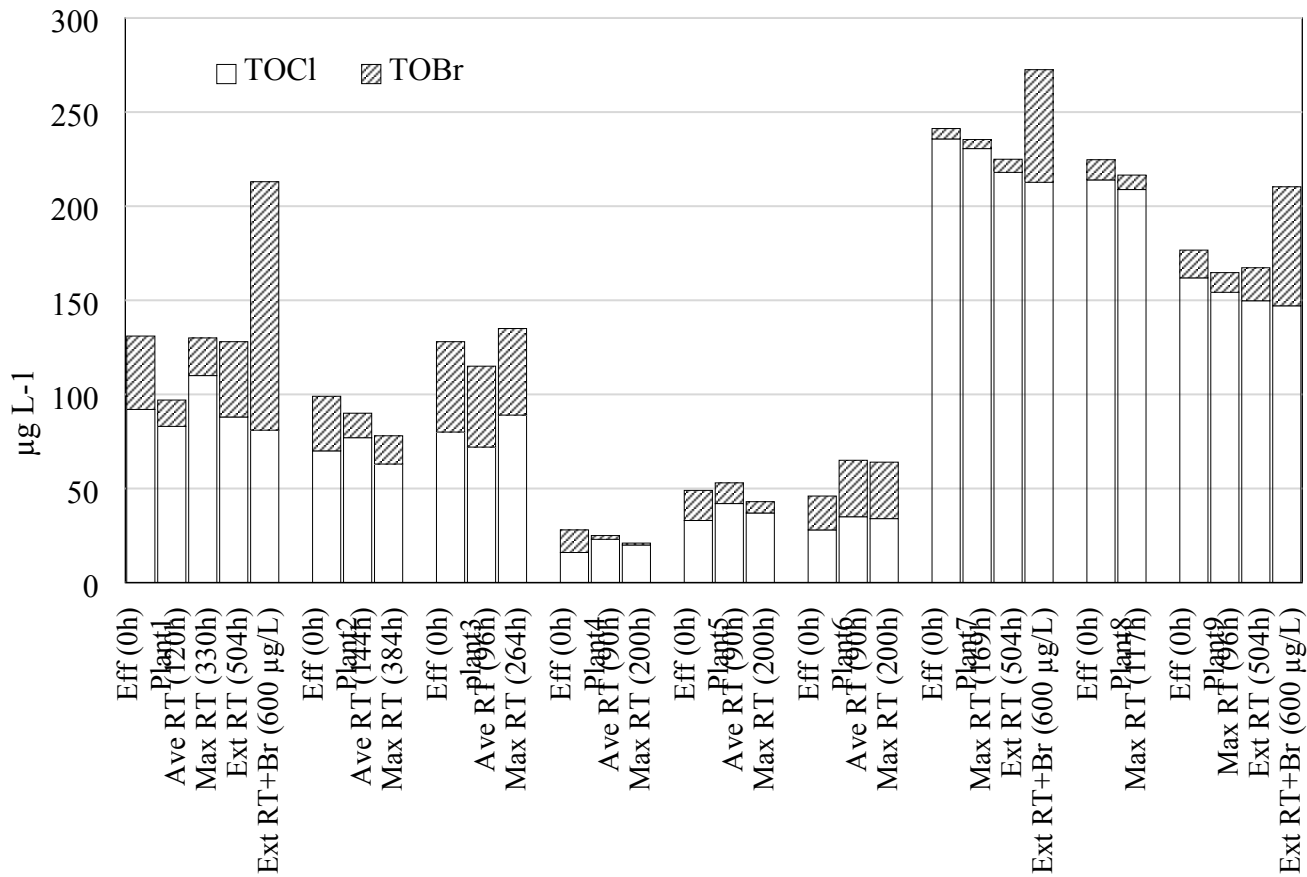

32

33 **Fig.S2** The holding experiment results with effluent samples collected from 9 chloraminated plants.

34 Ext RT denotes extended retention time (i.e., 504 h).

35

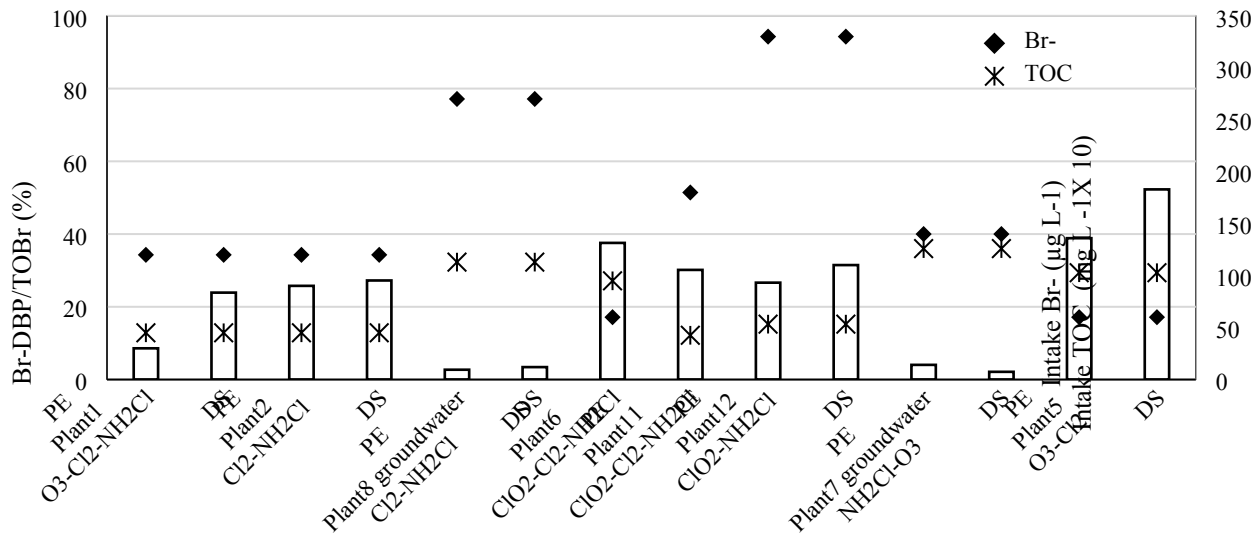

36

37 **Fig. S3** Calculated ratios of the regulated brominated DBPs to TOBr using the data reported Weinberg  
 38 et al., (2002) along with plant configurations, intake DOC (or TOC) and Br- concentrations. PE: plant  
 39 effluent, DS: distribution system.

40

41

42

43 **Reference**

44 H.S. Weinberg, S.W. Krasner, S.D. Richardson and A.D. Thruston, The Occurrence of Disinfection  
 45 By-Products (DBPs) of Health Concern in Drinking Water: Results of a Nationwide DBP Occurrence  
 46 Study. EPA/600/R-02/068. Athens, GA, 2002.
